# Supplementary material for: Reuteransucrase-catalytic kinetic modeling and functional characteristics for novel prebiotic gluco-oligomers
Source: Royal Society of Chemistry journal article supplement (doi:10.1039/d0fo00225a), 2020-01-01

Figure S1. The mass fragmentation patterns of reuteransucrase catalyzed gluco-oligomer mixtures.

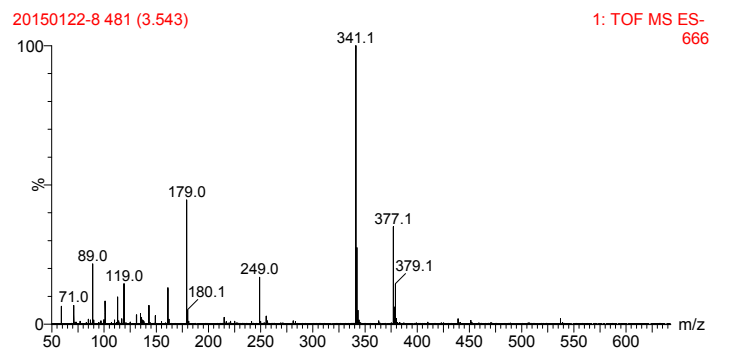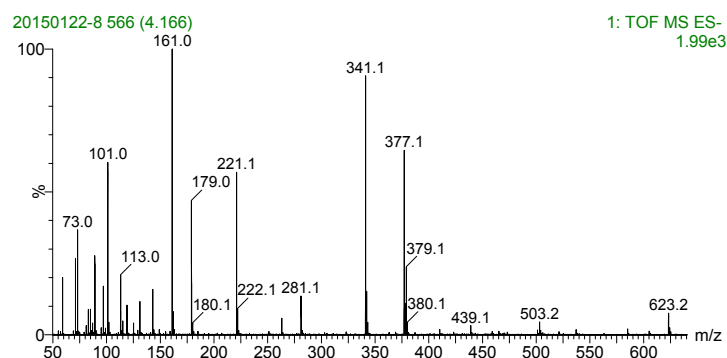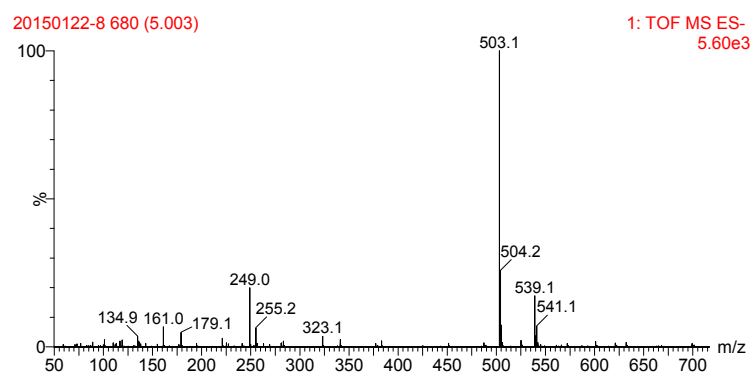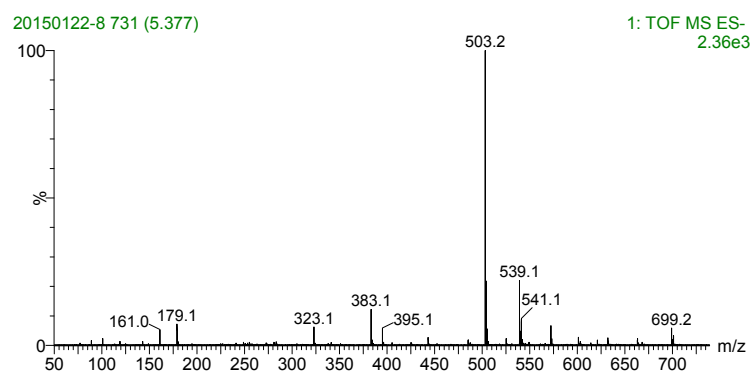

22-Jan-2015

1#

11:00:13

20150122-8 828 (6.089)

1: TOF MS ES-

3.46e3

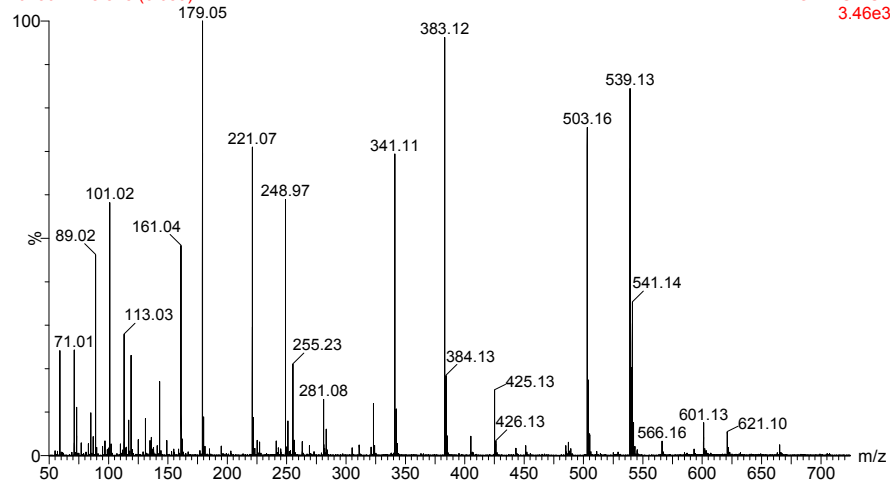

22-Jan-2015

1#

11:00:13

20150122-8 871 (6.404)

1: TOF MS ES-

1.10e3

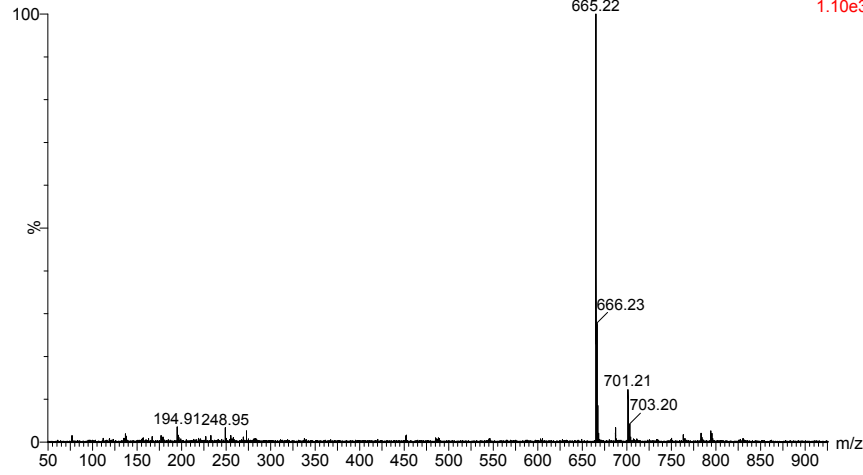

22-Jan-2015

1#

11:00:13

20150122-8 917 (6.742)

1: TOF MS ES-

752

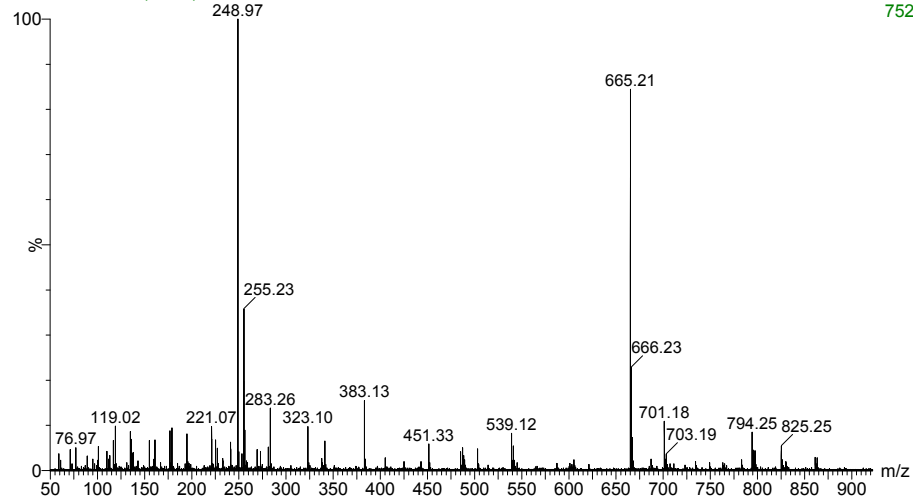

22-Jan-2015  
20150122-8 998 (7.336)

1#

11:00:13  
1: TOF MS ES-  
1.06e3

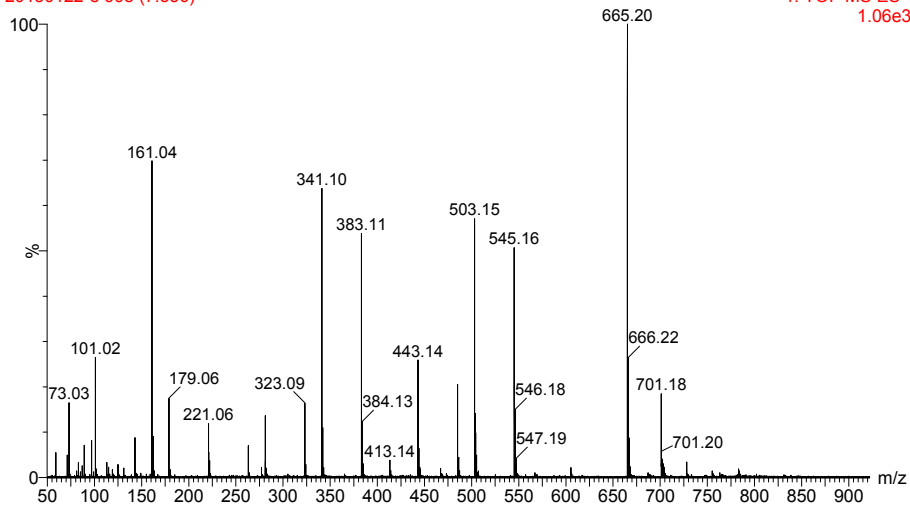

22-Jan-2015  
20150122-8 1165 (8.562)

1#

11:00:13  
1: TOF MS ES-  
4.62e3

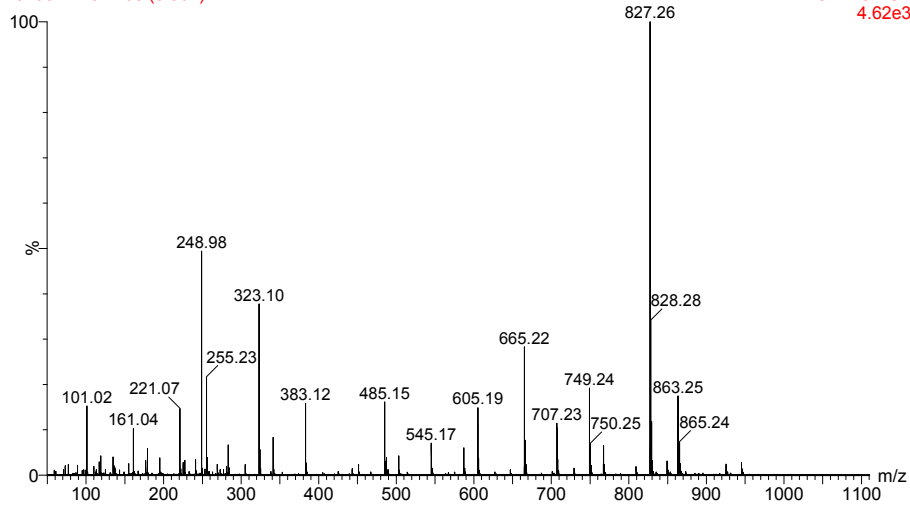

Supplement: d0fo00225a2.pdf [file d0fo00225a2.pdf]
